# Supplementary material for: Disulfiram and copper combination therapy targets NPL4, cancer stem cells and extends survival in a medulloblastoma model
Source: PubMed Central journal article supplement (PMC8565761; doi:10.1371/journal.pone.0251957), 2021-11-03

# ONS76

## Anti-NPL4

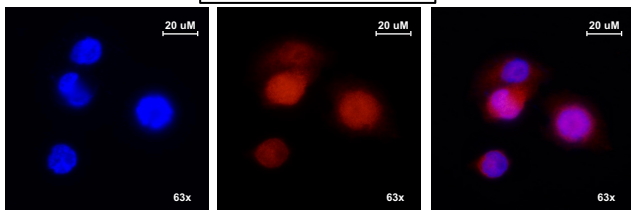

## Anti-H2AX

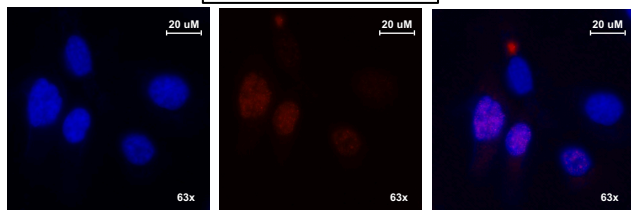

## Anti-AIF

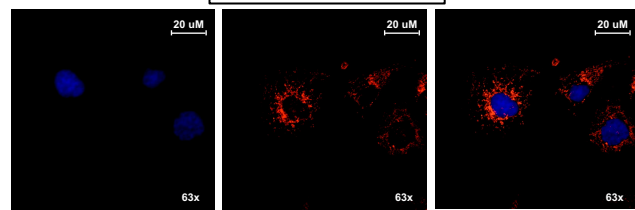

Dapi

TxR

DAPI-TxR

Dapi

TxR

DAPI-TxR

Dapi

TxR

DAPI-TxR

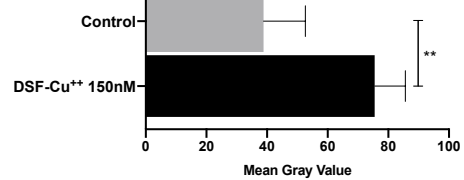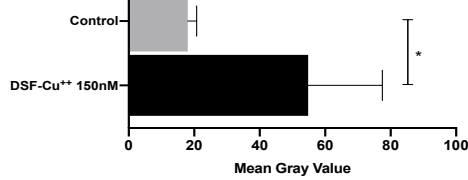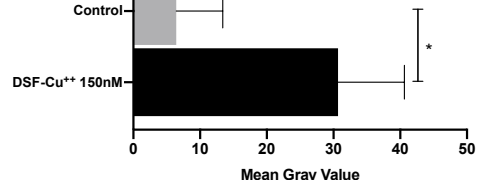

# D425med

## Anti-NPL4

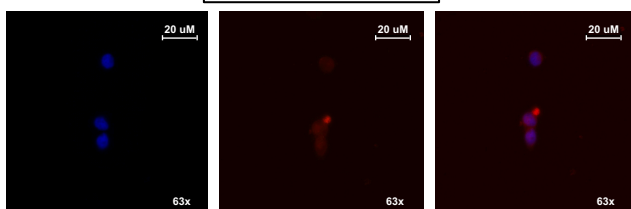

## Anti-H2AX

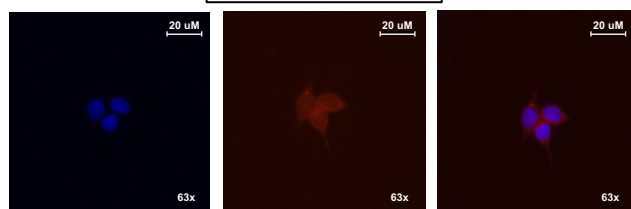

## Anti-AIF

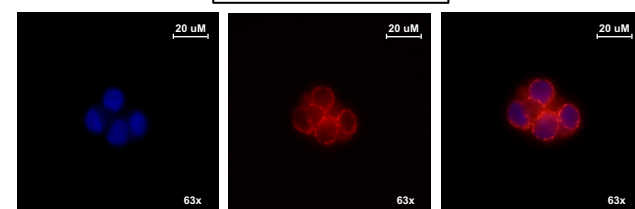

Dapi

TxR

DAPI-TxR

Dapi

TxR

DAPI-TxR

Dapi

TxR

DAPI-TxR

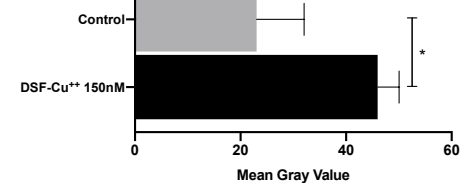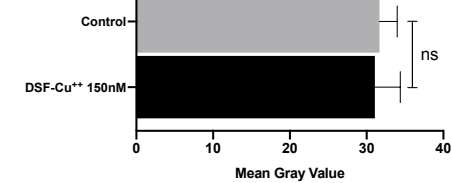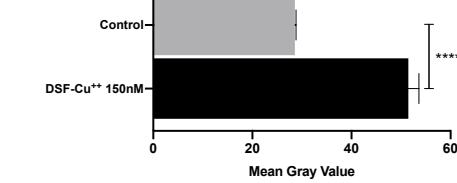

# D341med

## Anti-NPL4

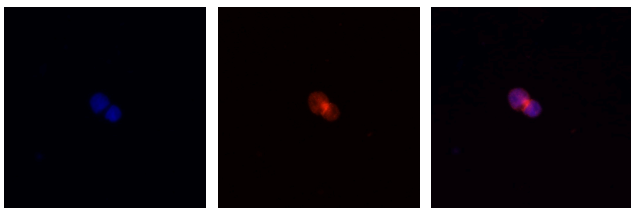

## Anti-H2AX

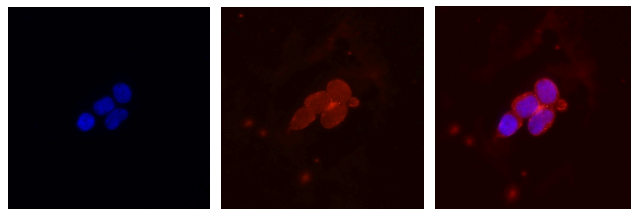

## Anti-AIF

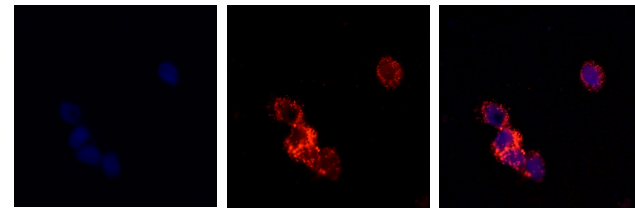

Dapi

TxR

DAPI-TxR

Dapi

TxR

DAPI-TxR

Dapi

TxR

DAPI-TxR

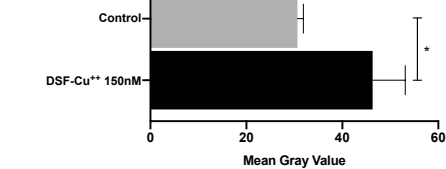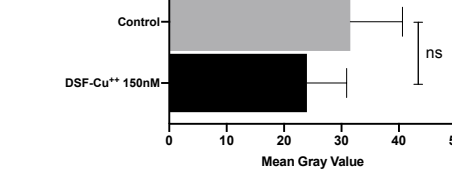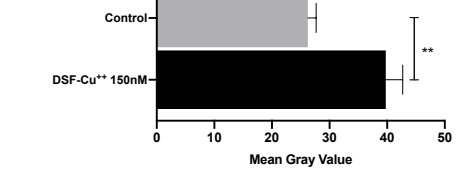

Supplement: pone.0251957.s007.pdf [file pone.0251957.s007.pdf]
