# Supplementary material for: Disulfiram and copper combination therapy targets NPL4, cancer stem cells and extends survival in a medulloblastoma model
Source: PubMed Central journal article supplement (PMC8565761; doi:10.1371/journal.pone.0251957), 2021-11-03

# Supplementary Figure 3

## UW228

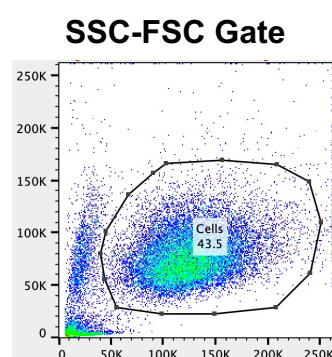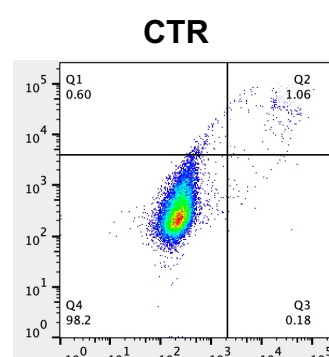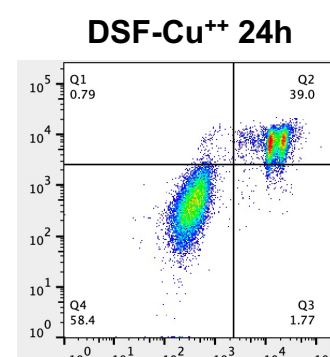

## ONS76

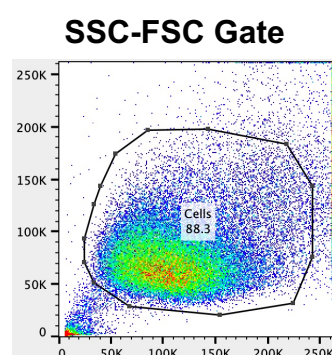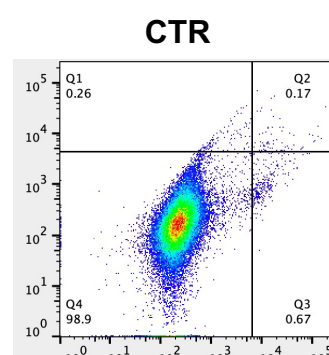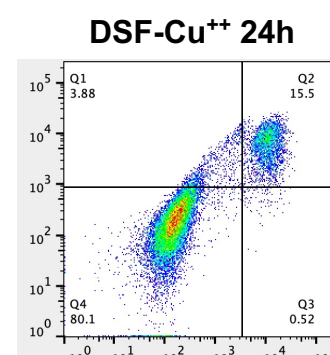

## D425med

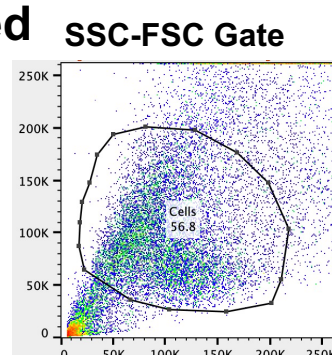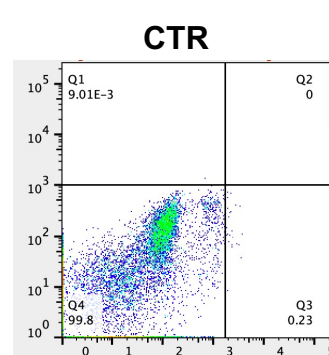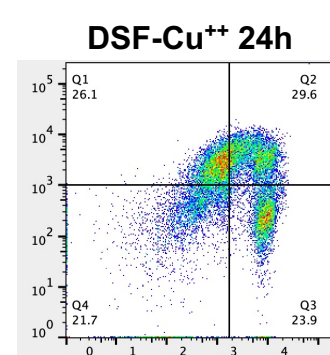

## D341

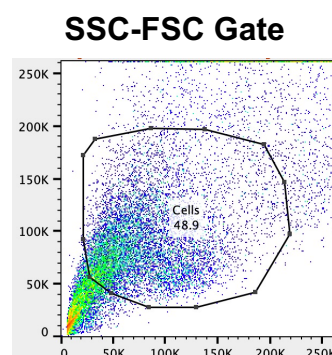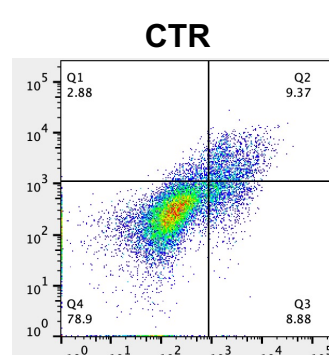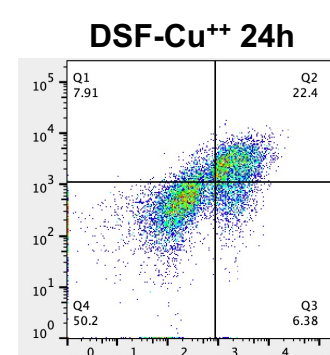

## D283

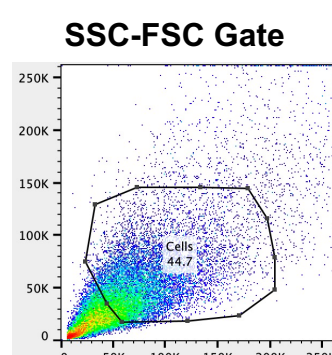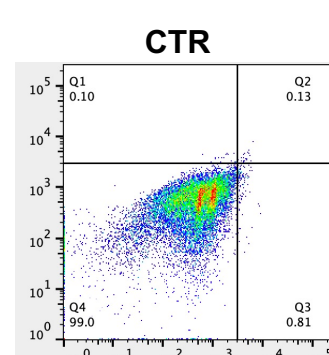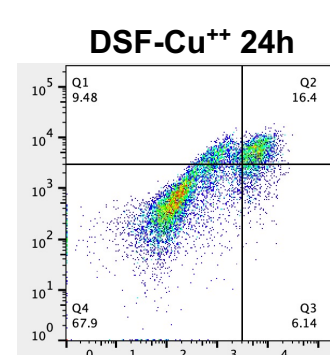

Supplement: pone.0251957.s003.pdf [file pone.0251957.s003.pdf]
