# Supplementary material for: Disulfiram and copper combination therapy targets NPL4, cancer stem cells and extends survival in a medulloblastoma model
Source: PubMed Central journal article supplement (PMC8565761; doi:10.1371/journal.pone.0251957), 2021-11-03
Supplement: pone.0251957.s004.pdf [file pone.0251957.s004.pdf]

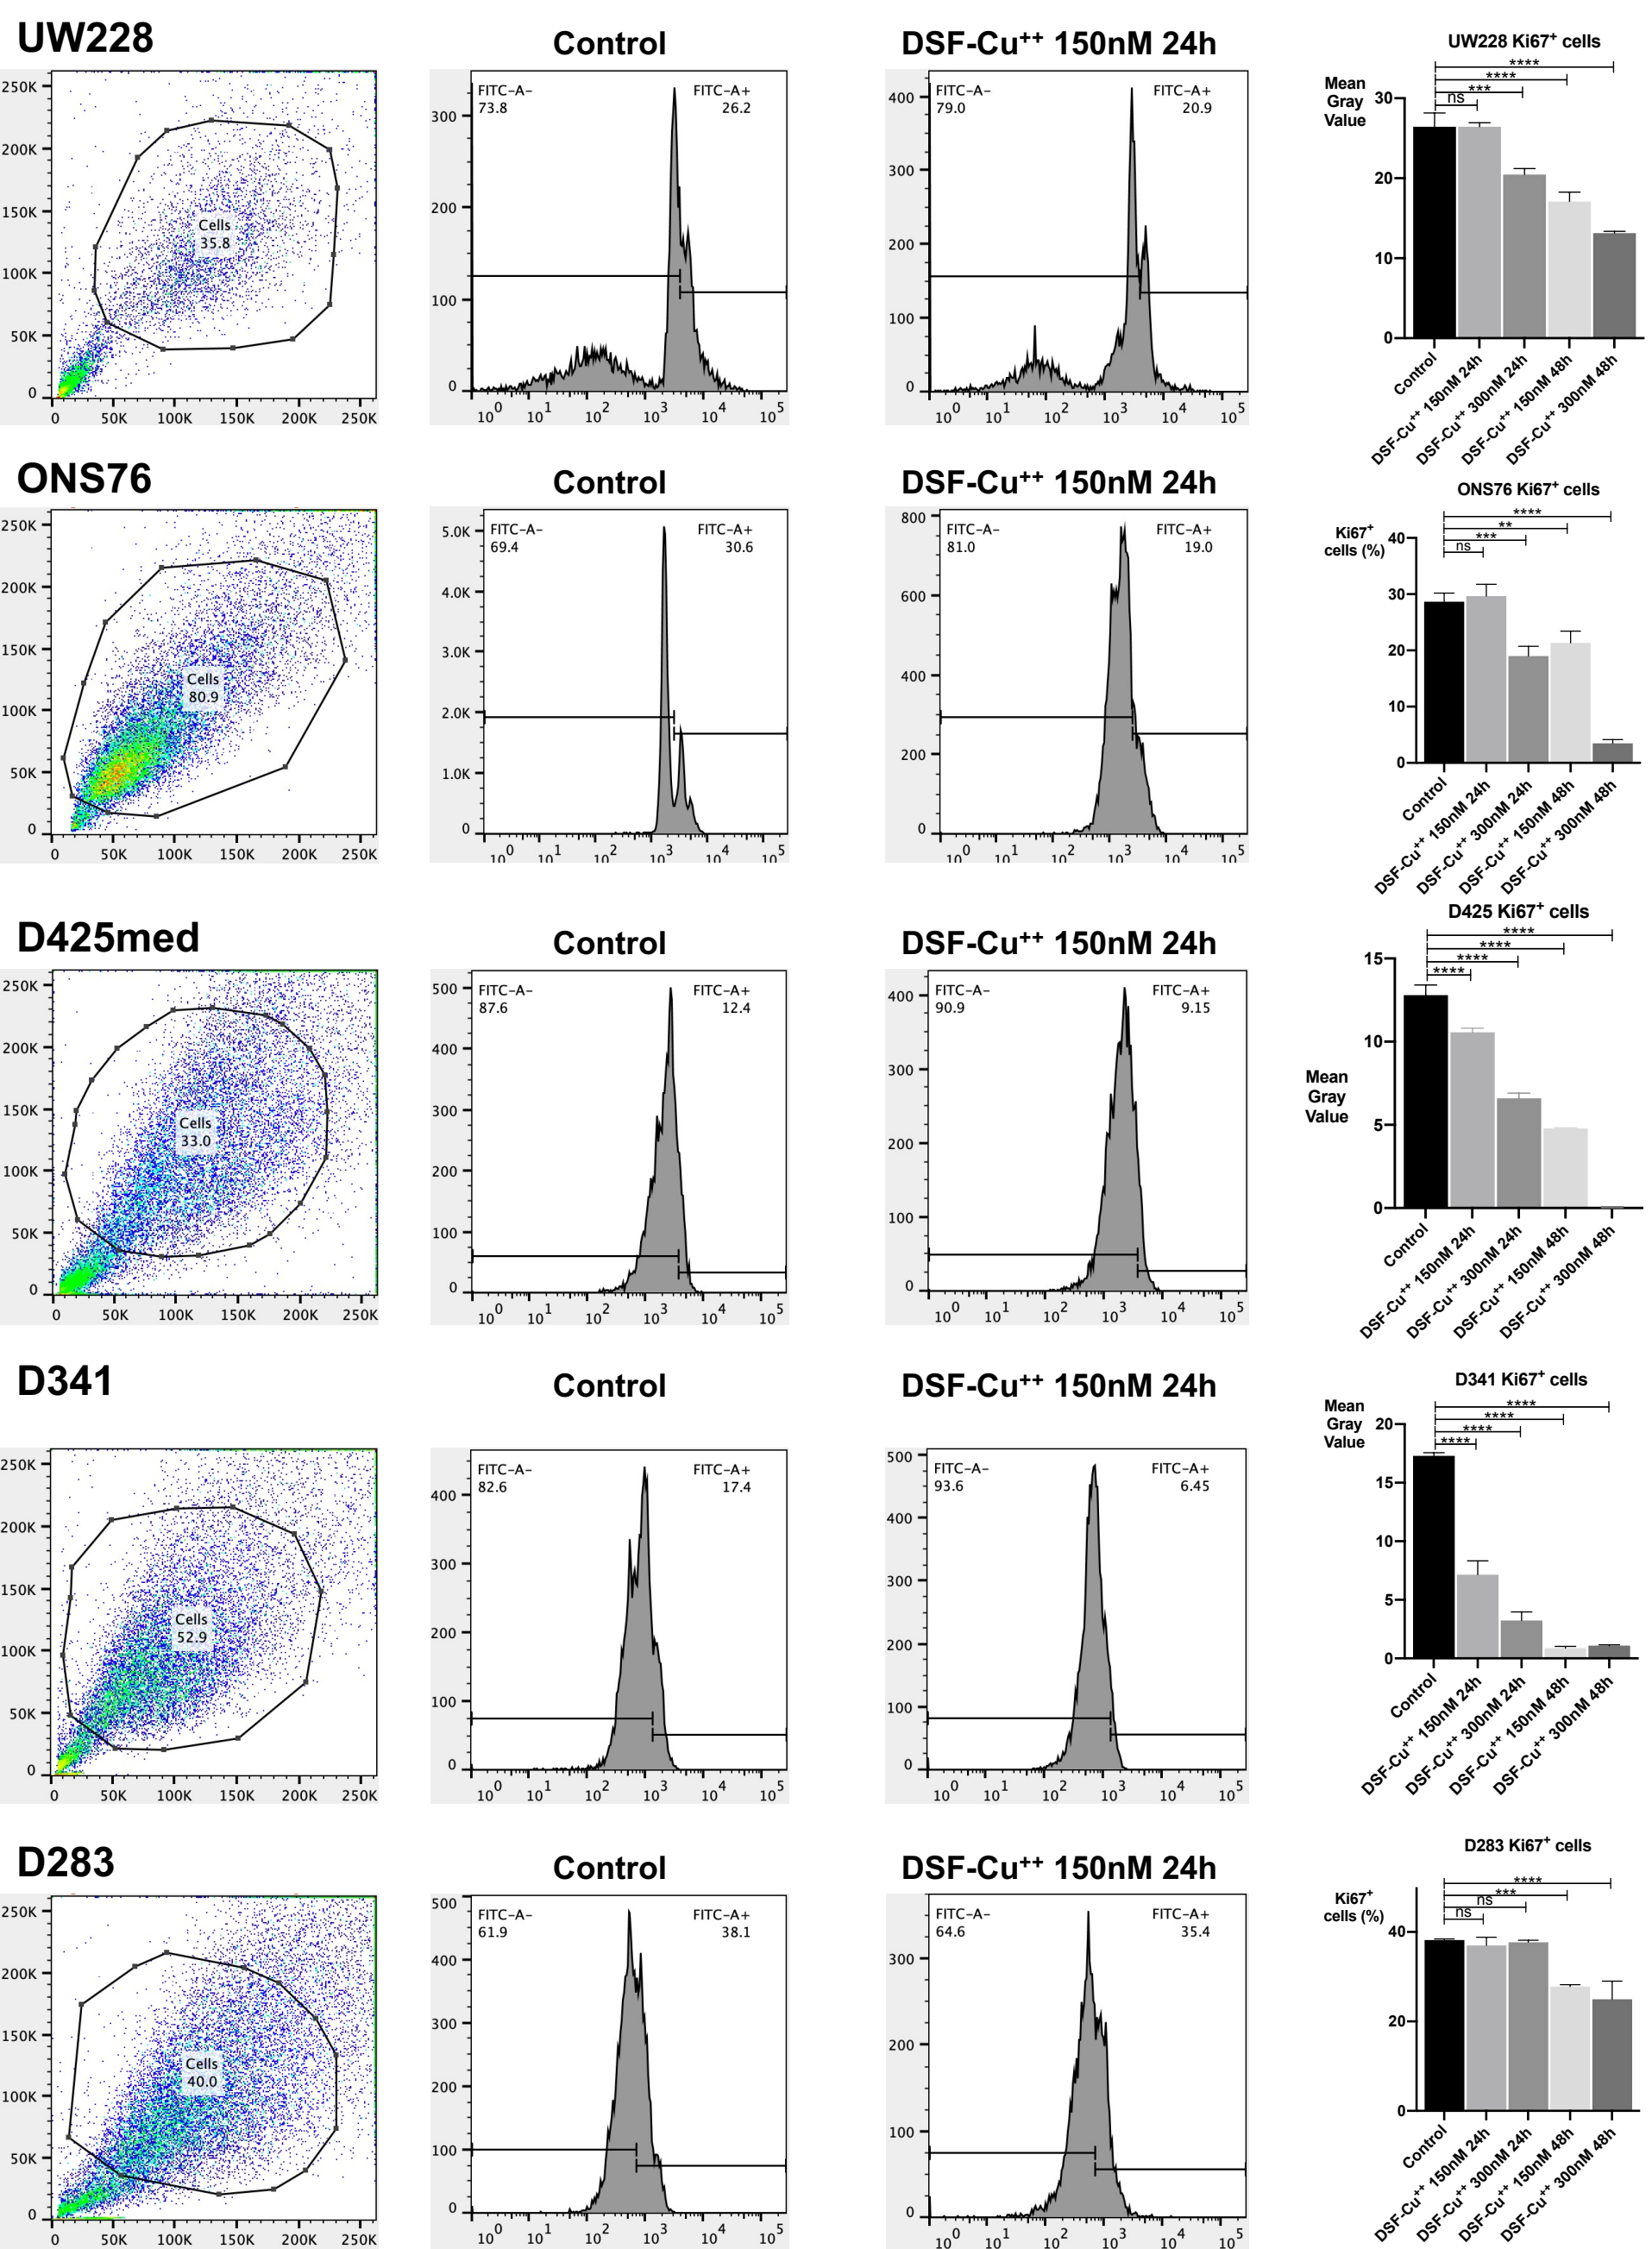

**Supplementary Figure 4**
